# Supplementary material for: Microsporidia: Why Make Nucleotides if You Can Steal Them?
Source: PubMed Central journal article supplement (PMC5113988; doi:10.1371/journal.ppat.1005870), 2016-11-17

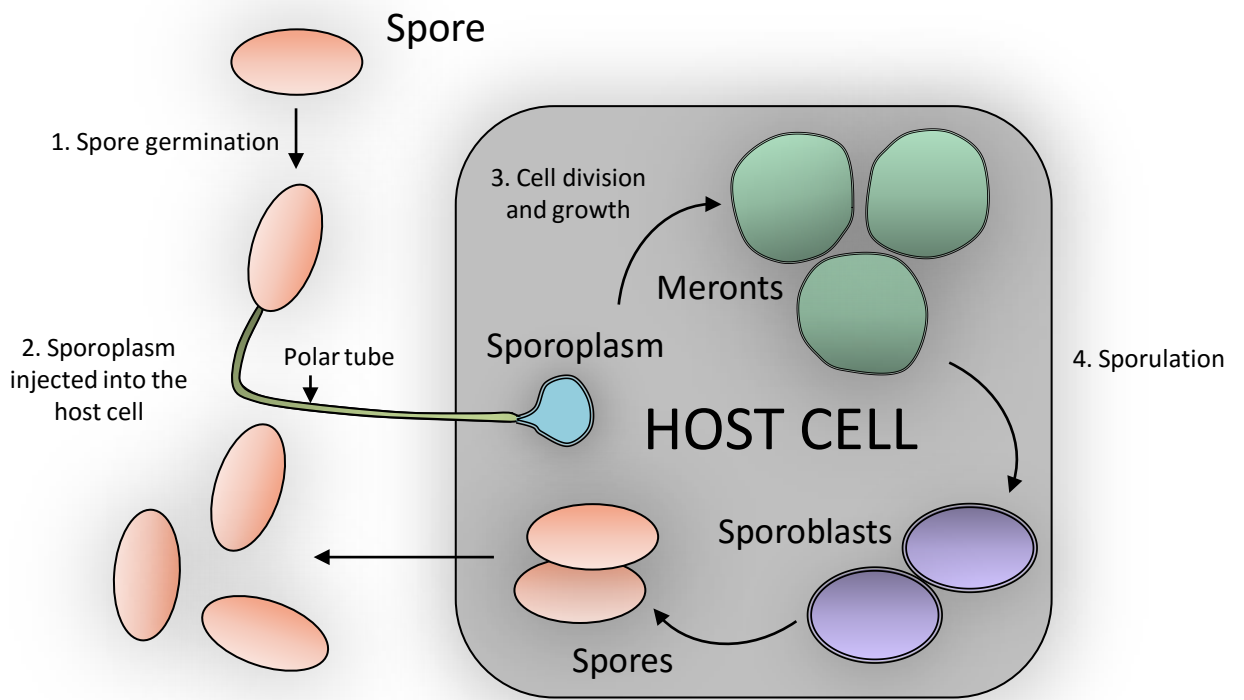

Supplement: ppat.1005870.s001.pdf [file ppat.1005870.s001.pdf]
